# Supplementary material for: Lanthanide oxide supported Ni nanoparticles for the selective hydrogenation of cinnamaldehyde
Source: Royal Society of Chemistry journal article supplement (doi:10.1039/d2cy01868c), 2023-01-01
Supplement: d2cy01868c1.pdf [file d2cy01868c1.pdf]

## **Supporting Information**

**for**

### **Lanthanide oxides supported Ni nanoparticles for the selective hydrogenation of cinnamaldehyde**

Huiyue Xin<sup>1,#</sup>, Mengnan Li<sup>1,#</sup>, Li Chen<sup>1</sup>, Chen Zhao<sup>1,2</sup>, Peng Wu<sup>1,2</sup>, Xiaohong Li<sup>1,2\*</sup>

<sup>1</sup>Shanghai Key Laboratory of Green Chemistry and Chemical Processes, School of Chemistry and Molecular Engineering, East China Normal University, 3663 North Zhongshan Rd., Shanghai 200062, China.

<sup>2</sup>Institute of Ecochongming, Shanghai 202162, China

# These authors contributed equally to this work.

Corresponding author: Xiaohong Li

Tel: 0086-21-62238590

E-mail: xhli@chem.ecnu.edu.cn

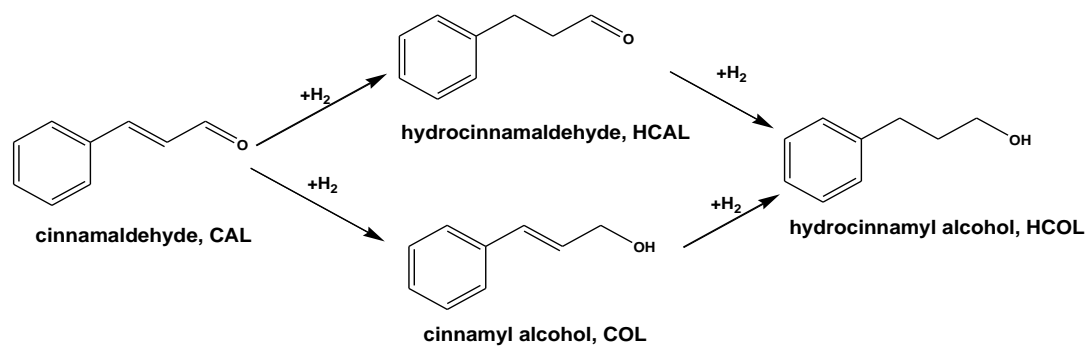

**Scheme S1** Reaction routes of CAL hydrogenation.

**Table S1** Physicochemical properties of NiO-LaO<sub>x</sub> composites precursor with different calcination temperature.

| Sample                                  | S <sub>BET</sub> <sup>a</sup> (m <sup>2</sup> ·g <sup>-1</sup> ) | V <sub>p</sub> <sup>a</sup> (cm <sup>3</sup> ·g <sup>-1</sup> ) |
|-----------------------------------------|------------------------------------------------------------------|-----------------------------------------------------------------|
| NiO-LaO <sub>x</sub> -600               | 7.7                                                              | 3                                                               |
| NiO-LaO <sub>x</sub> -700               | 5.7                                                              | 0                                                               |
| NiO-LaO <sub>x</sub> -900               | 2.2                                                              | 2                                                               |
| NiO-LaO <sub>x</sub> -800* <sup>b</sup> | 2.0                                                              | 0                                                               |

<sup>a</sup> The BET specific surface area and pore volume were calculated per g of sample;

<sup>b</sup> NiO-LaO<sub>x</sub>-800\* was prepared without using glucose as template.

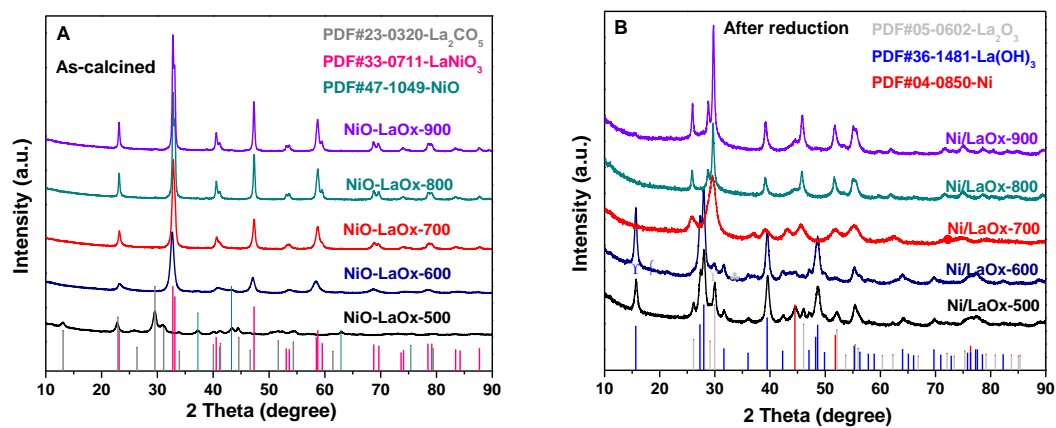

**Fig. S1** XRD patterns of (A) as-calcined and (B) reduced Ni/La<sub>2</sub>O<sub>3</sub> catalysts after calcination at different temperatures.

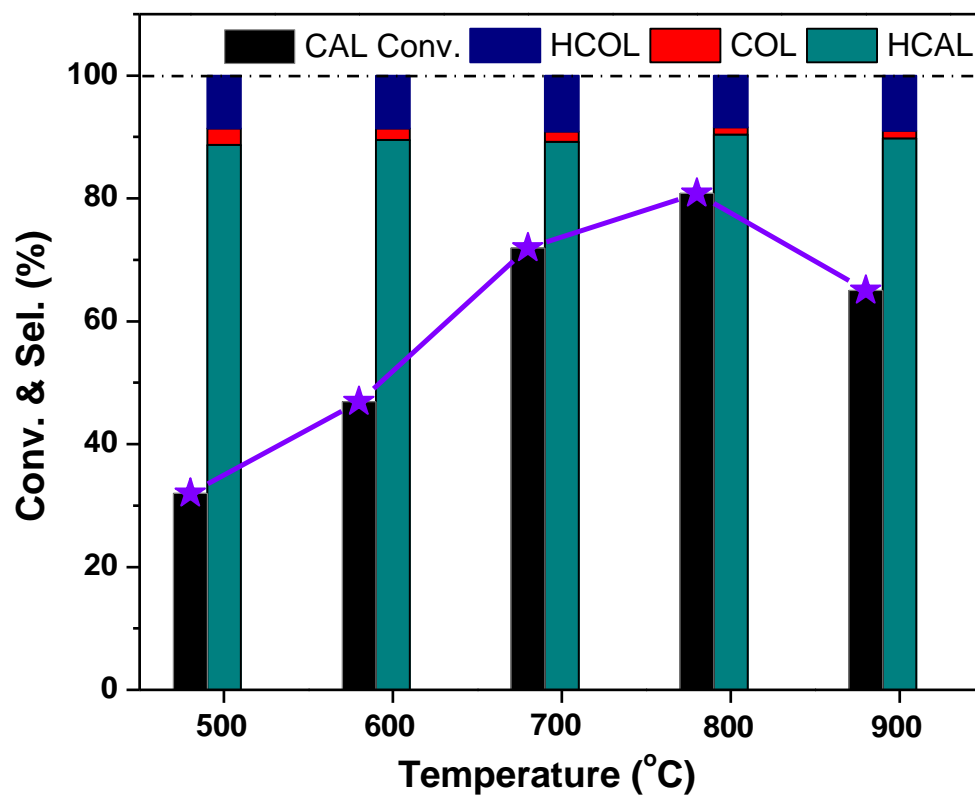

**Fig. S2** Liquid-phase selective hydrogenation of CAL over the Ni/La<sub>2</sub>O<sub>3</sub> catalysts after calcination at different temperatures.

Reaction conditions: 25 mg of catalyst; 7.5 mmol of CAL; 2.0 MPa of H<sub>2</sub>; 9 mL of isopropyl alcohol + 1 mL of H<sub>2</sub>O; 1200 rpm; 90 °C; 15 min.

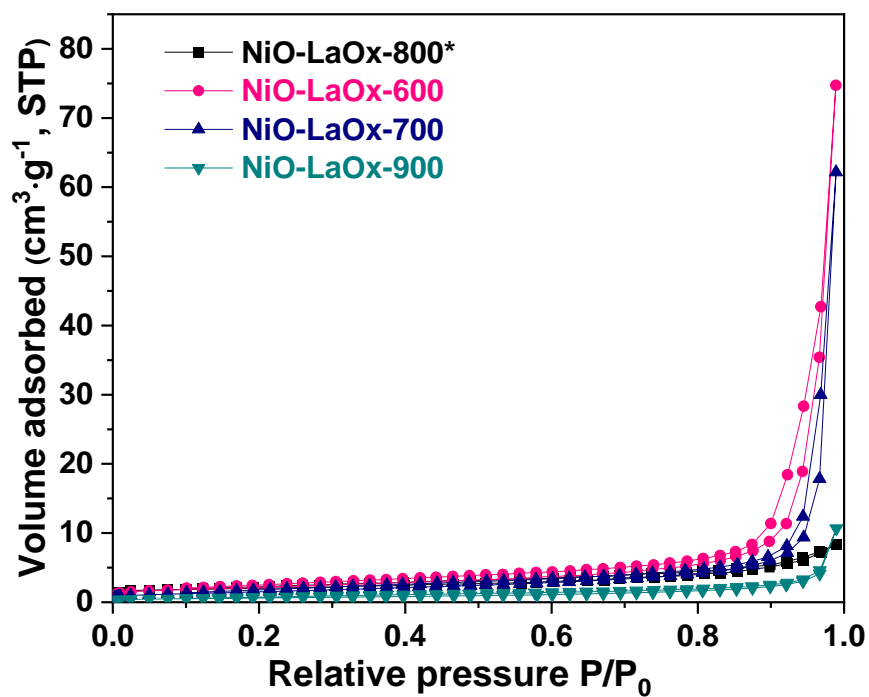

**Fig. S3** N<sub>2</sub>-physisorption isotherms of NiO-LaO<sub>x</sub> composite precursors with different calcination temperatures.

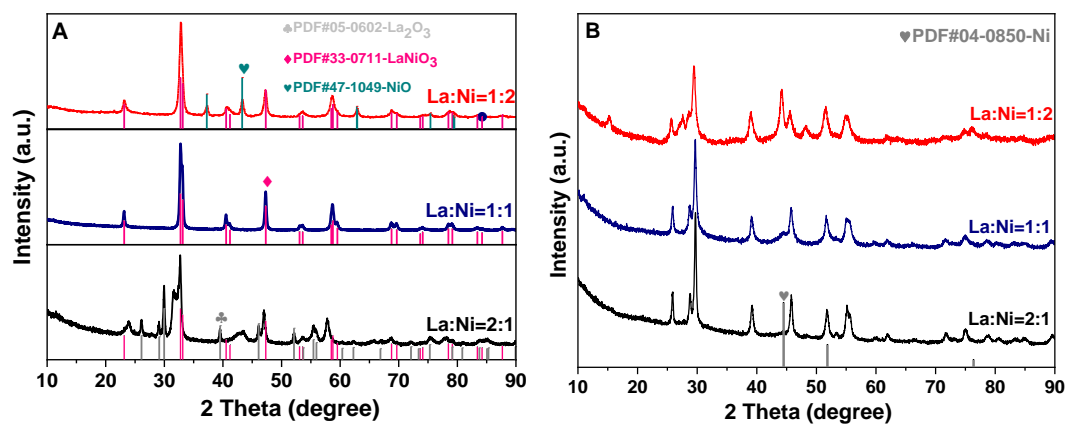

**Fig. S4** XRD patterns of (A) as-calcined and (B) reduced Ni/La<sub>2</sub>O<sub>3</sub> catalysts with different La/Ni molar ratios.

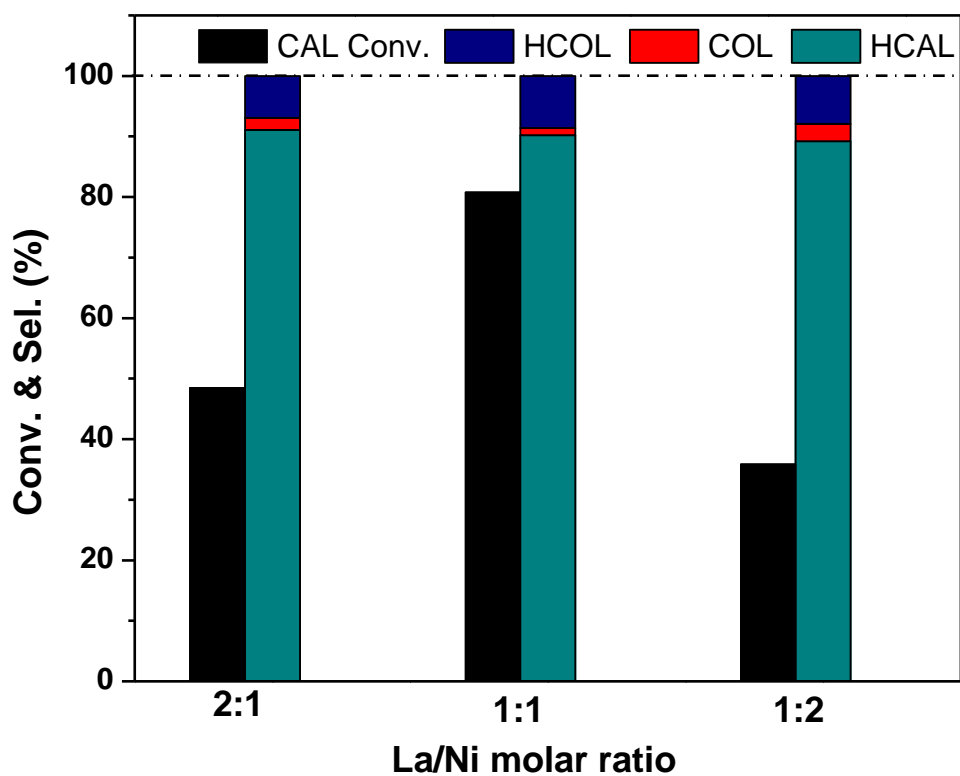

**Fig. S5** Liquid-phase selective hydrogenation of CAL over the Ni/La<sub>2</sub>O<sub>3</sub> catalysts with different La/Ni molar ratios. Reaction conditions: 25 mg of catalyst; 7.5 mmol of CAL; 2.0 MPa of H<sub>2</sub>; 9 mL of isopropyl alcohol + 1 mL of H<sub>2</sub>O; 1200 rpm; 90 °C; 15 min.



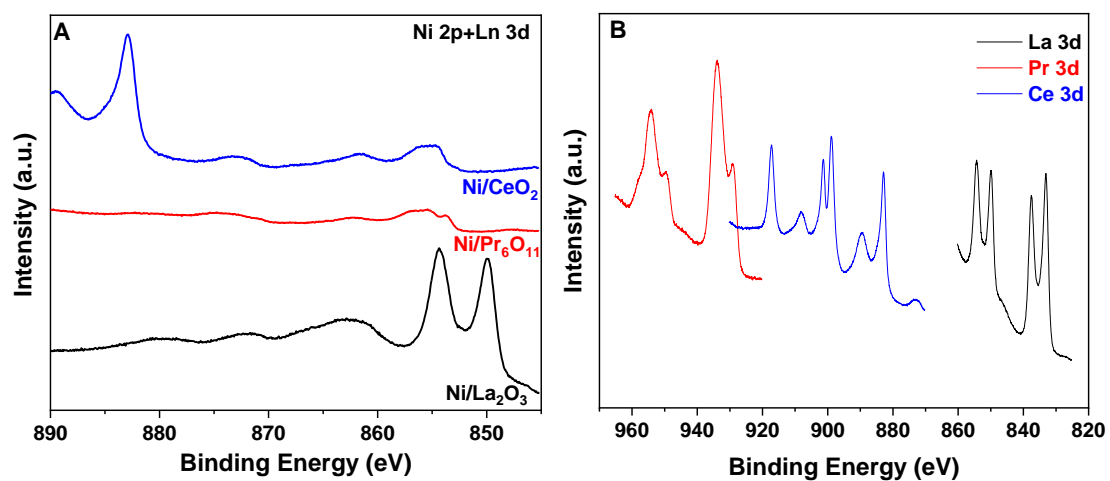

**Fig. S6.** XPS spectra of (A) Ni2p, (B) La3d, Pr3d and Ce3d for Ni/LnO<sub>x</sub> catalysts after in-situ pre-reduction in hydrogen at 500 °C for 2 h.

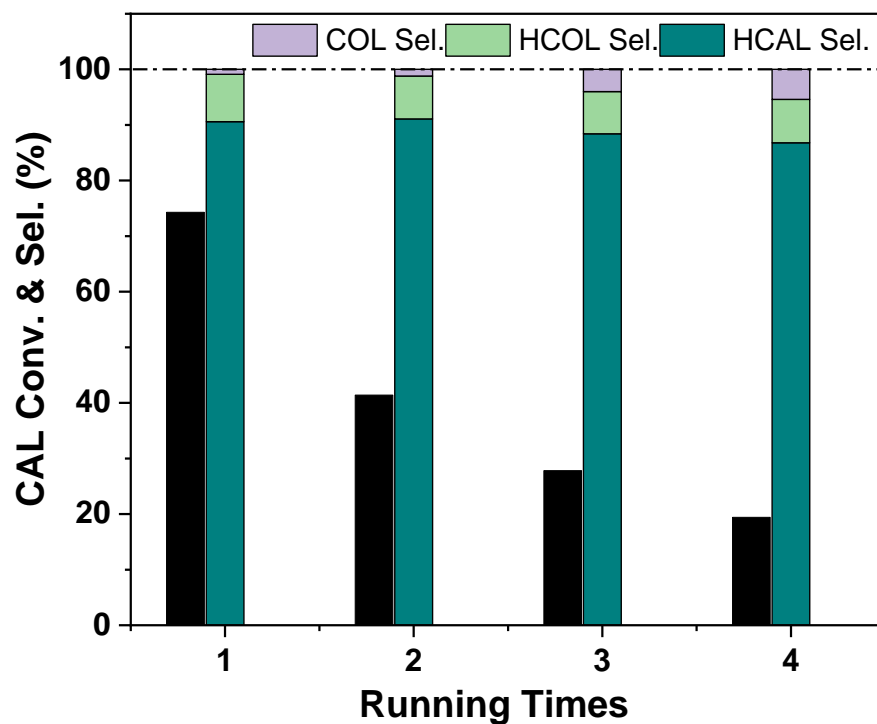

**Fig. S7** Reusability of the Ni/La<sub>2</sub>O<sub>3</sub> catalyst for the selective hydrogenation of CAL to HCAL in a mixed solvent. Reaction conditions: 25 mg catalyst; 7.5 mmol CAL; 9 mL isopropyl alcohol + 1 mL water; 1200 rpm; 90 °C; 15 min.

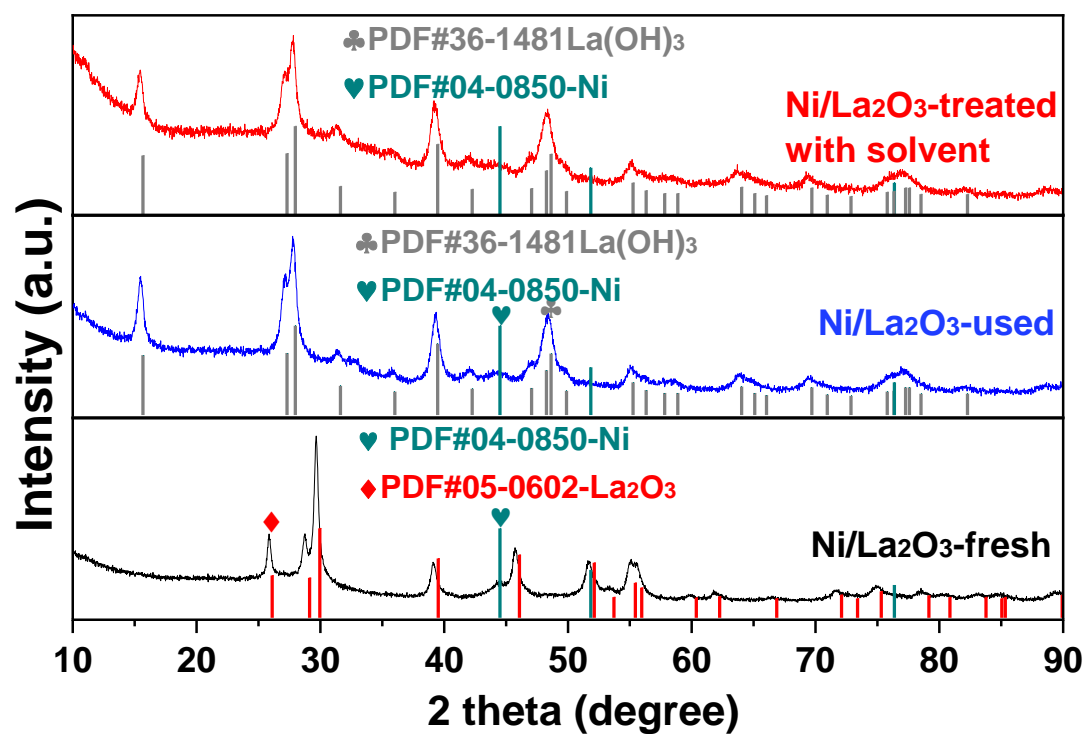

Fig. S8 XRD patterns of the used Ni/La<sub>2</sub>O<sub>3</sub> catalyst in the mixed solvent (9 mL isopropanol + 1 mL water) and the Ni/La<sub>2</sub>O<sub>3</sub> catalyst treated with water.
